# Supplementary material
Source: publisher figshare collection journal article supplement (https://f1000.figshare.com/ndownloader/files/1030372)
Supplement: Supplementary file 1 [file 1030372]

## Sheet: Channel width DNA extracted
Channel width	v1	v2	v3	v4	v5	v6	v7	v8	v9	v10	v11	v12	v13	v14	v15	v16	v17	v18	v19	v20
0	3.45	2.92	5.2	4.48	5.48	4.08	5.86	6.54	3.54	3.94	3.98	5.16	2.34	8	2.02	5.1	4.86	3.68	5.58	3.44
0.1	4.853	5.5	7.16	6.48	6.2	2.4	4.26	3.94	5.04	8.24	4.58	0.93	1.11	0	2.84	3.54	3.72	3.56	3.7	6.9
0.15	4.646	8.08	7.48	8.4	6.16	7.52	2.72	4.52	7.68	6.3	6.56	5.98	5.2	0.48	6.42	2.48	5.7	5.88	5.08	10.96
0.2	10.12	7.68	0.14	7.04	1.42	2.46	3.32	4.32	9.62	1.08	0.69	3.34	0.39	0.37	0.81	0.75	11.22	7.58	0.91	3.12
0.25	0.8648	0.2	0.14	10.56	0.64	0.13	0.28	0	0.44	0.97	0.92	0.19	0.18	0.2	1.7	1.17	0.47	2.32	5.8	2.84
0.3	0	0.79	0.43	5.9	0.15	0.16	0.19	0.74	0.34	1.43	0.42	0.17	0.21	0.37	0.44	0.26	0	2.32	0	0

## Sheet: Channel width pain scores
Channel width	v1	v2	v3	v4	v5	v6	v7	v8	v9	v10	v11	v12	v13	v14	v15	v16	v17	v18	v19	v20
0	1	1	2	1	4	3	0	0	1	1	1	2	0	1	0	2	1	0	2	1
0.1	2	2	2	1	2	1	0	0	0	1	1	1	2	2	3	2	1	0	4	1
0.15	1	2	2	1	1	1	0	0	1	2	1	1	3	2	4	3	1	1	3	1
0.2	1	1	3	0	3	3	0	0	1	2	2	1	4	2	2	2	2	0	1	1
0.25	1	2	2	0	2	2	0	1	1	1	0	2	1	2	4	1	2	0	5	1
0.3	1	2	2	1	2	2	1	0	0	0	0	1	2	2	2	2	2	0	1	1

## Sheet: Velocity DNA extracted
Velocity	v1	v2	v3	v4	v5	v6	v7	v8	v9	v10	v11	v12	v13	v14	v15	v16	v17	v18	v19	v20
1.1	0.1946	0	0	0	0	0	0	0	0.2	0	0	0.17	0.13	0.13	0.14	0.15	0	0	0	0
9.2	0.358	1.33	1.63	1.752	0.4	2.72	0	0.43	0.79	0.46	1.46	0.42	0.244	0.18	0.29	2.48	0.242	0.81	0	0
16.6	7.4	8.92	0.91	4.82	4.56	3.58	4.28	0	8.58	12.88	9.76	6.42	0	7	3.8	6.8	1.88	2.54	7.72	5.8
20.2	14.56	7.7	1.7	17.02	0.4	0	4.74	6.54	2.32	9.76	2.72	4.86	0	7.52	4.68	6.46	3.3	4.26	5.4	6.18

## Sheet: Velocity pain scores
Velocity	v1	v2	v3	v4	v5	v6	v7	v8	v9	v10	v11	v12	v13	v14	v15	v16	v17	v18	v19	v20
1.1	0	0	0	0	0	0	0	0	0	0	0	0	0	0	0	0	0	0	0	0
9.2	1	0	1	0	0	0	0	0	0	1	1	1	2	2	3	1	1	0	1	1
16.6	1	1	2	0	0	1	1	0	0	1	1	1	2	3	3	2	3	1	2	1
20.2	1	2	1	1	4	2	0	0	1	0	0	0	1	2	3	3	3	1	2	2

## Sheet: Roughness amp. DNA extracted
Roughness Amplitude	Error bar	v1	v2	v3	v4	v5	v6	v7	v8	v9	v10	v11	v12	v13	v14	v15	v16	v17	v18	v19	v20
0.92	0.369181	1.908	2.32	2.36	2.08	1.078
1.32	0.962084	2.58	3.8	3.72	4.76	3.18
5.36	1.84396	4.646	8.08	7.48	8.4	6.16	7.52	2.72	4.52	7.68	6.3	6.56	5.98	5.2	0.48	6.42	2.48	5.7	5.88	5.08	10.96

## Sheet: RNA extraction
Trial number	Total RNA
1	1.09
2	1.95
3	25.52
4	11.67
5	4.58
